# Supplementary material for: Probing Rad51-DNA interactions by changing DNA twist
Source: PubMed Central journal article supplement — Nucleic Acids Res. 2012 Nov 23;40(22):11769–76. doi: 10.1093/nar/gks1131 (PMC3526263; doi:10.1093/nar/gks1131), 2012-11-23
Supplement: supp_gks1131_nar-01829-h-2012-File006.pdf [file supp_gks1131_nar-01829-h-2012-File006.pdf]

## **Probing Rad51-DNA interactions by changing DNA twist**

### **[Supplementary Information]**

Scott Atwell<sup>1\*</sup>, Ludovic Disseau<sup>1\*</sup>, Alicja Z. Stasiak<sup>2</sup>, Andrzej Stasiak<sup>2</sup>, Axelle Renodon-Cornière<sup>3</sup>, Masayuki Takahashi<sup>3</sup>, Jean-Louis Viovy<sup>1</sup>, Giovanni Cappello<sup>1</sup>

<sup>1</sup>Institut Curie, Centre de Recherche-Physico-Chimie-Curie, CNRS UMR168, Université P. et M. Curie, Paris, F-75231, France

<sup>2</sup>Centre Intégréatif de Génomique, Faculté de Biologie et de Médecine, Université de Lausanne, CH-1015 Lausanne, Switzerland

<sup>3</sup> Unité Fonctionnalité et Ingénierie des Protéines, FRE CNRS 3478, Université de Nantes, Nantes F-44322 Cedex 03, France

\*These authors contributed equally to this work

Corresponding authors

A.S. [Andrzej.Stasiak@unil.ch](mailto:Andrzej.Stasiak@unil.ch) and G.P. [giovanni.cappello@curie.fr](mailto:giovanni.cappello@curie.fr)

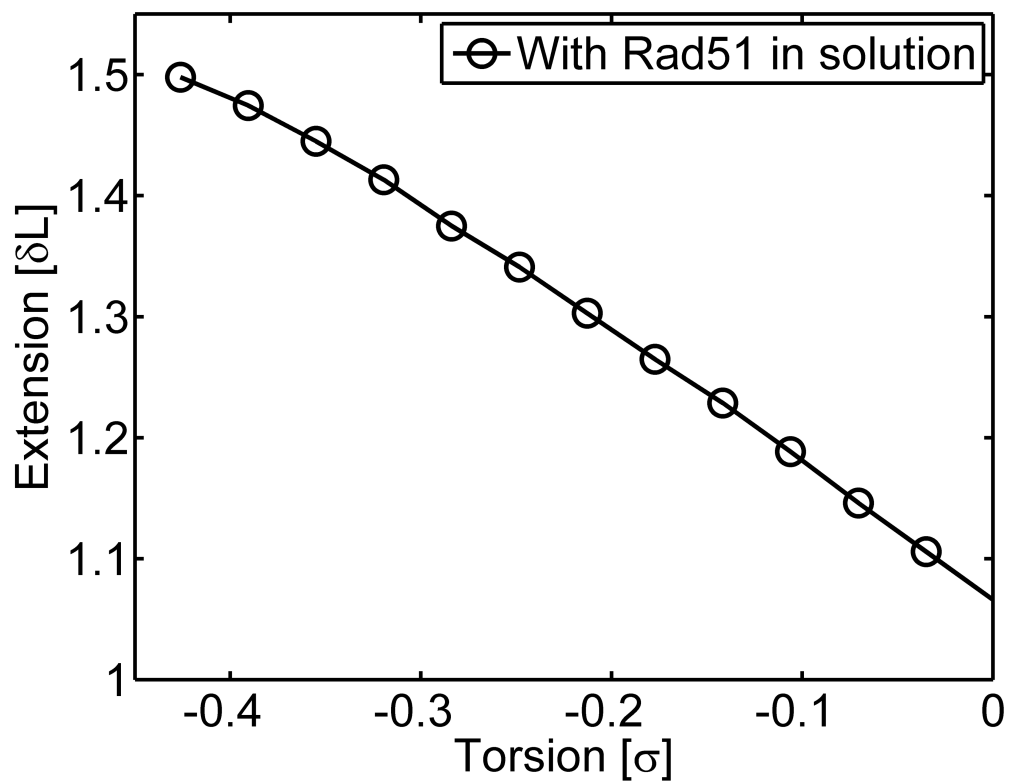

**Figure S1:** Torsion/Extension curve of a Rad51-dsDNA filament assembled at  $\sigma = -0.43$  (18.6 bp/turn) and kept in the presence of saturating amounts of Rad51 in the solution during progressive rewinding toward natural helicity of protein-free DNA ( $\sigma = 0$ ).

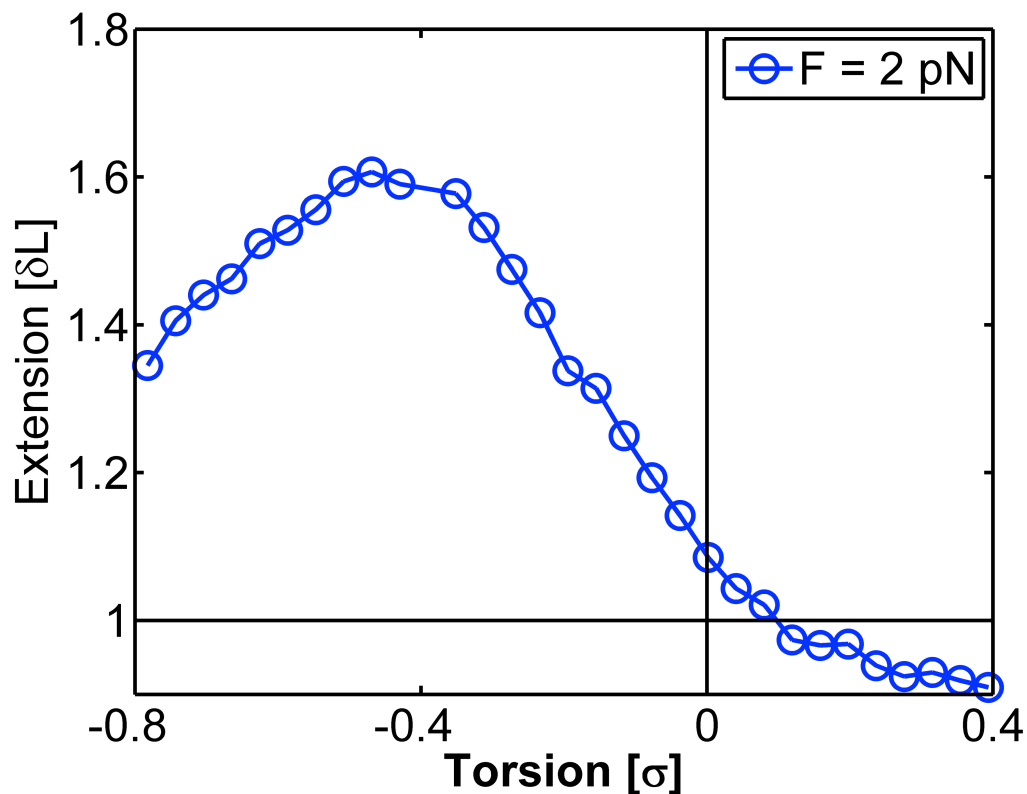

**Figure S2:** Behaviour of Rad51-dsDNA complexes over a broader range of DNA twist changes. The Rad51-dsDNA complexes formed in the presence of ATP reach their maximum extension for the enforced DNA helicity corresponding to ca 18.6 bp/turn ( $\sigma = -0.43$ ). When the DNA was overwound above  $\sigma = 0$ , we observed shortening of the end-to-end distance, which may be explained by progressive dissociation of Rad51 and formation of localized plectonemes. There is a partial dissociation of Rad51 as DNA is overwound above  $\sigma = 0$  or underwound below  $\sigma = -0.5$ .
